# Supplementary material for: A column-like organization for ocular dominance in mouse visual cortex
Source: Springer Nature journal article supplement (doi:10.1038/s41467-025-56780-3), 2025-02-25
Supplement: MOESM1 [file 41467_2025_56780_MOESM1_ESM.pdf]

Supplementary information for

## A column-like organization for ocular dominance in mouse visual cortex

Goltstein, P.M., Laubender, D., Bonhoeffer, T., & Hübener, M.

**Includes:**

Supplementary Figures 1 – 14

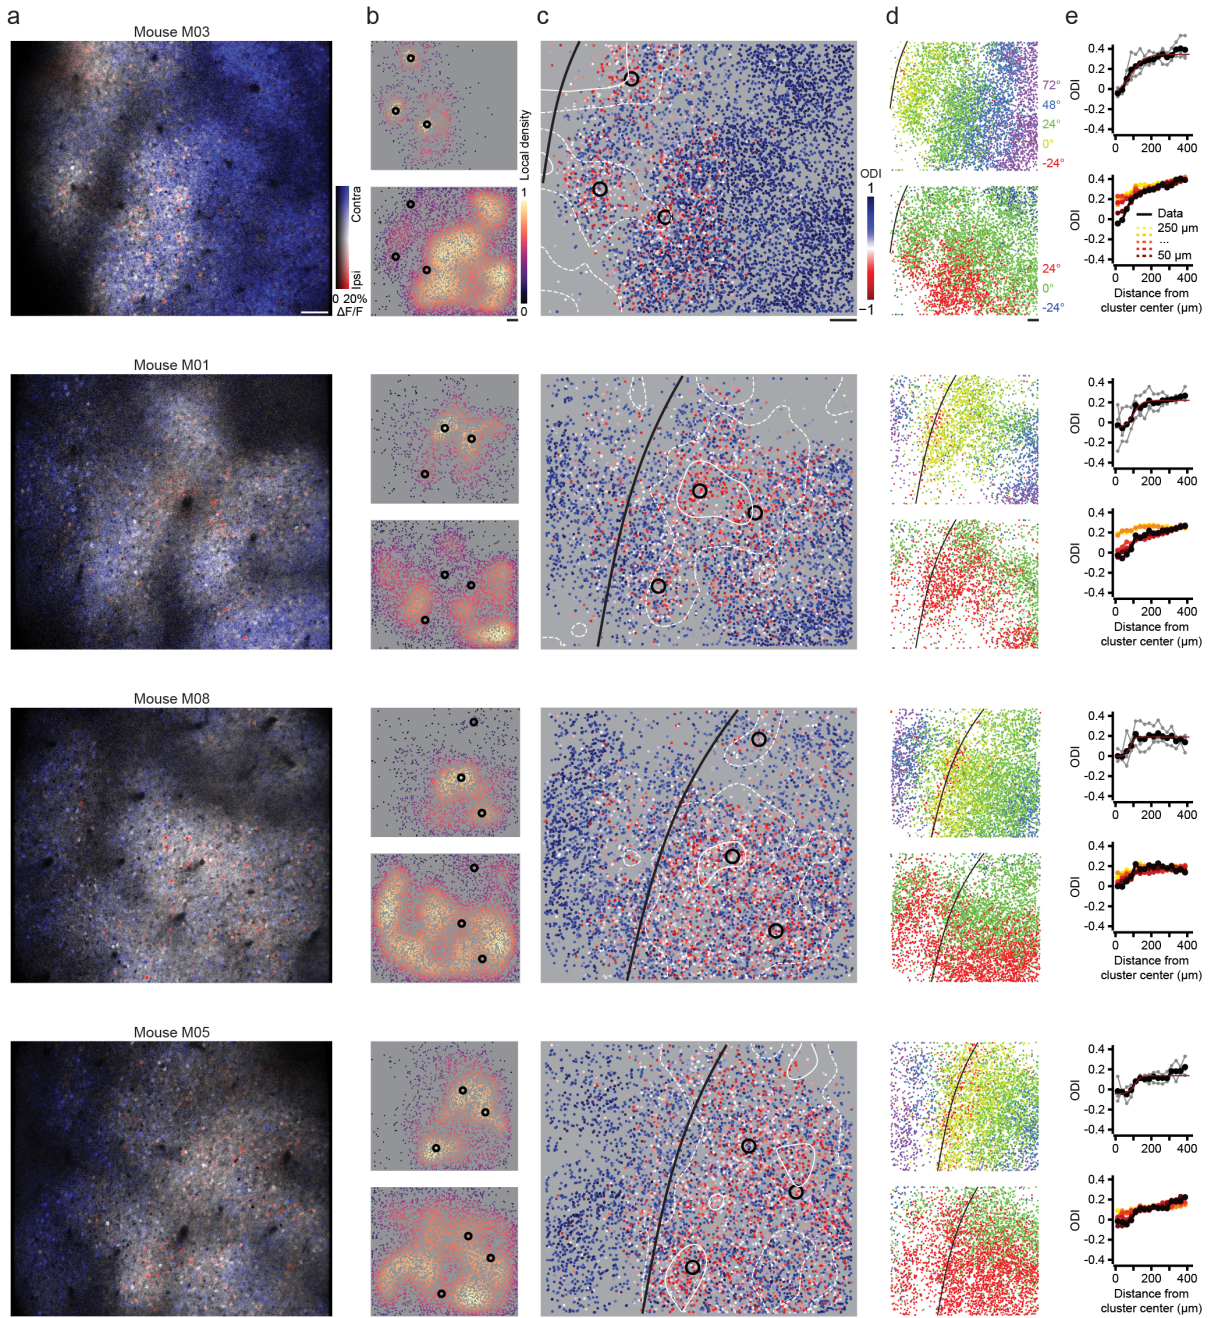

**Supplementary Figure 1 | Examples of ipsilateral eye preferring ocular dominance clusters in GCaMP6s transgenic mice.**

Each row shows data of all visually responsive neurons recorded from four imaging planes in layer 4 of a single mouse (see Fig. 1a). **a**, HLS map for ocular dominance. Hue: Eye-preference (contralateral: Blue; ipsilateral: Red). Lightness:  $\Delta F/F$  response amplitude. Saturation: Eye selectivity). **b**, Local density for each visually responsive neuron. Top: Ipsilateral eye preferring neurons. Bottom: Contralateral eye preferring neurons. Black circles mark the centers of ipsi-clusters, detected in the local density map for ipsilateral eye preferring neurons (top). **c**, Ocular dominance of each visually responsive neuron. White iso-ODI lines delineate ODI = 0 (solid) and ODI = 0.2 (dashed), the black line shows the lateral border of V1 (see **d**). **d**, Preferred azimuth (top) and elevation (bottom) in the layer 4 volume. Black line: V1 lateral boundary. **a-d**, Scale bar: 200  $\mu\text{m}$ . **e**, Top: ODI as a function of distance to ipsi-cluster centers (Gray: Individual ipsi-clusters. Black: Mean across ipsi-clusters). Bottom: As top, but for the local randomization control, swapping the ODIs of pairs of cells at a radius of 50  $\mu\text{m}$  (dark red) to 250  $\mu\text{m}$  (yellow).

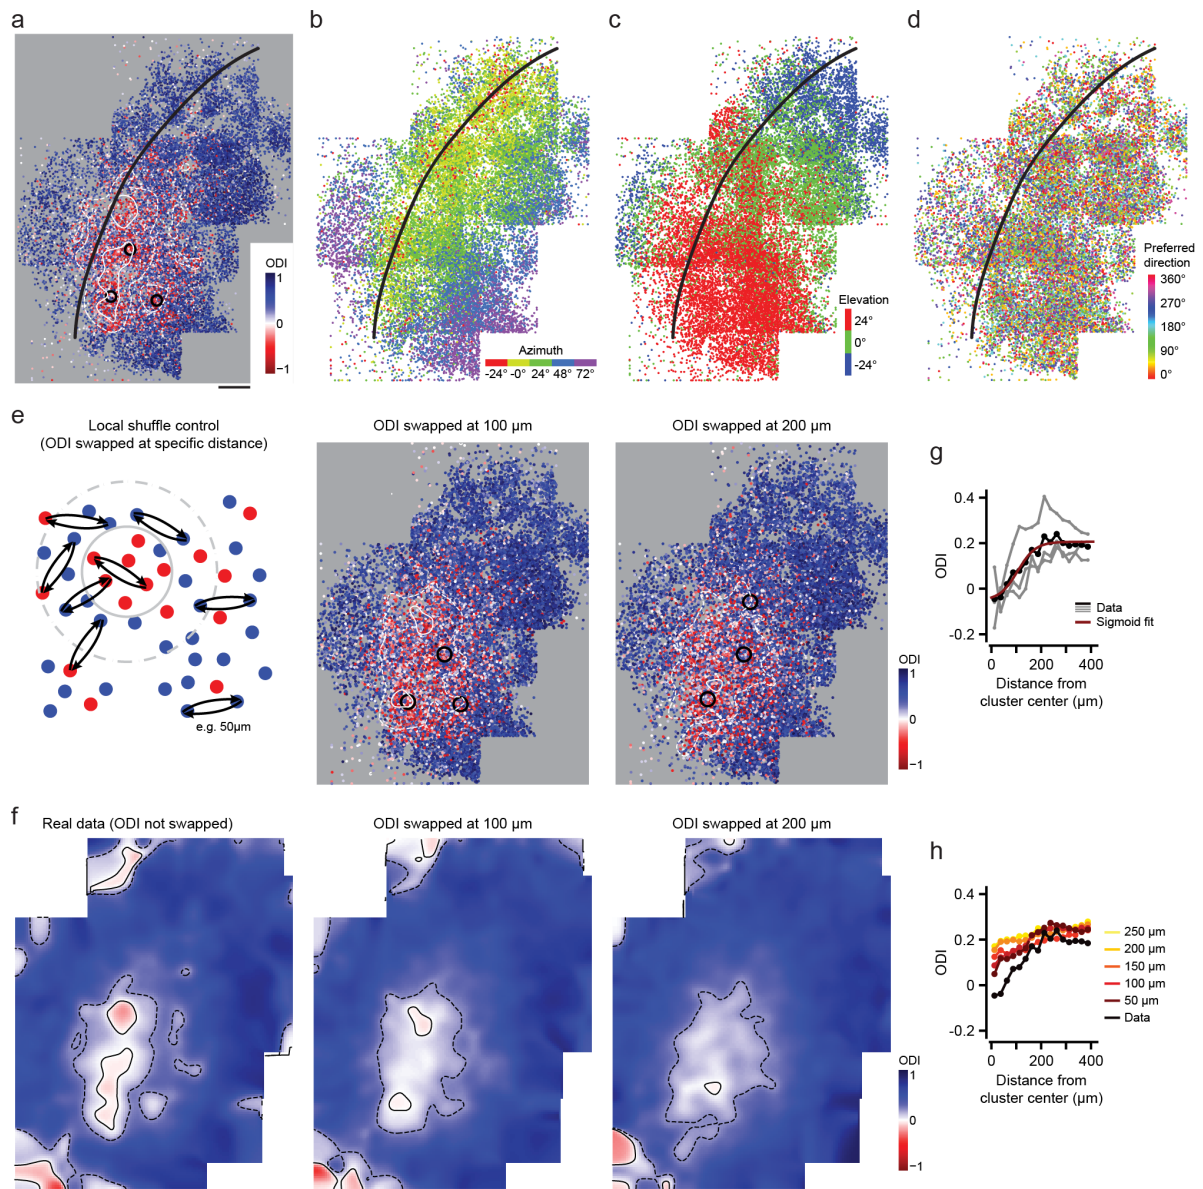

**Supplementary Figure 2 | Tiled, large-field of view feature maps of mouse binocular visual cortex and the effect of local randomization by repositioning cells within a fixed radius of their original position.**

**a-d**, Spatial position of all visually responsive neurons from five multiplane layer 4 recordings, stitched into a single map color-coded for **a**, eye preference, **b**, preferred azimuth, **c**, preferred elevation and **d**, preferred orientation (data of mouse M06). Black line: Estimated boundary separating primary visual cortex (right) and lateral higher visual areas (left). White lines in **(a)** indicate ODI = 0 (solid) and ODI = 0.2 (dashed), black circles mark identified ipsi-clusters. Scale bar: 200  $\mu$ m. **e**, Left: Schematic illustrating the process of local randomization by swapping the ODIs of pairs of neurons at a specified distance. Middle: ODI map following local randomization at a distance of 100  $\mu$ m. Right: As middle, but for swapping pairs of neurons at 200  $\mu$ m distance. White: Iso-ODI lines for ODI = 0 (solid) and ODI = 0.2 (dashed). Black circles: Centers of ipsi-clusters detected in each data set. **f**, Smoothed ODI maps, based on the data shown in **(a)** and **(e)**. Smoothing was done using a 50  $\mu$ m Gaussian kernel. Black: Iso-ODI lines for ODI = 0 (solid) and ODI = 0.2 (dashed). Scale bar: 200  $\mu$ m. **g**, ODI as a function of distance to ipsi-cluster centers for the data in **(a)**, left. Gray: Data for individual ipsi-cluster centers. Black: Mean. Red: Sigmoid fit. **h**, As **(g)**, but showing the mean ODI "In" ipsi-clusters for different distances at which the ODIs of neuron-pairs were swapped (local randomization control, 100 swaps per distance). Ipsi-clusters were detected anew for each local randomization individually.



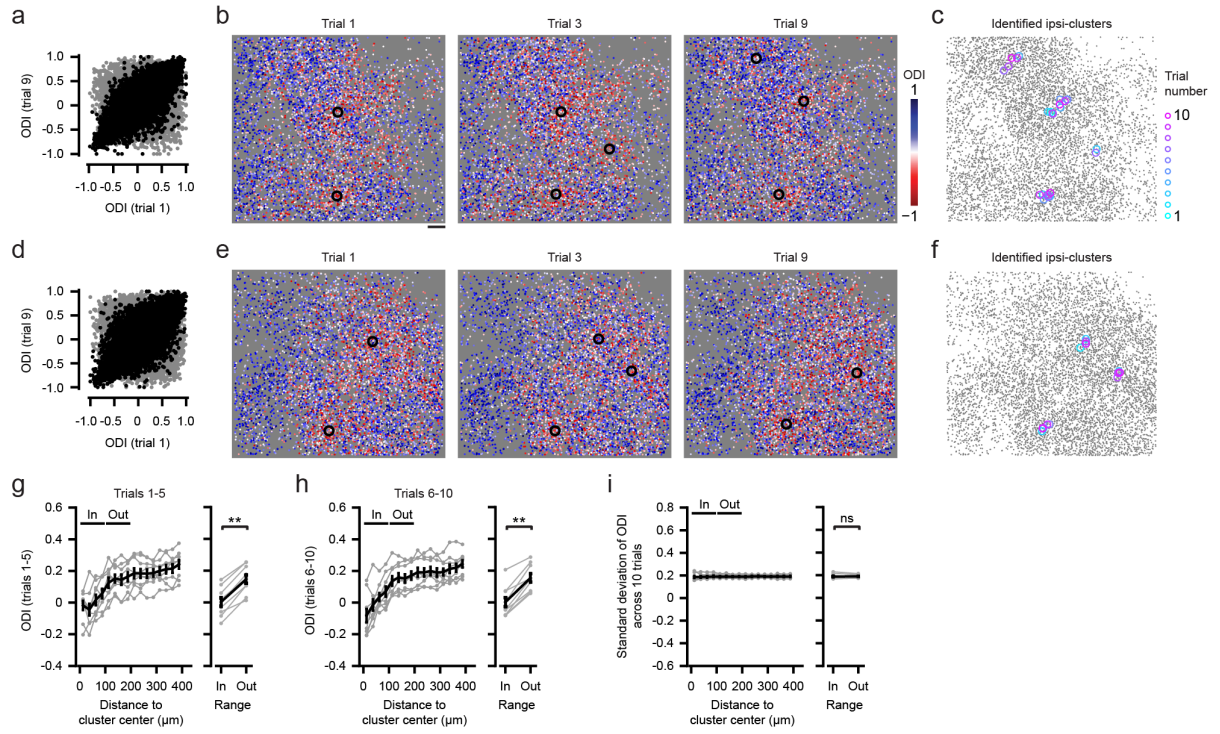

### Supplementary Figure 3 | Trial-to-trial variability in ODI and ipsi-clusters

**a**, Scatter plot of single neuron ODI values calculated on single trial-blocks (one repetition of eight drifting grating directions per eye), trial-block 1 versus trial-block 9. Black: Real data. Gray: ODI's shuffled across neurons. Data of mouse M02. **b**, ODI maps based on single trial-block ODI values. Black circles: Identified ipsi-clusters. Scale bar: 100  $\mu$ m. **c**, Identified ipsi-clusters across individual trial-blocks (note that some clusters are not clearly visible as they overlay with each other). **d-f**, As (**a-c**), but for mouse M05. **g**, Left: ODI as a function of distance to ipsi-cluster centers for trial-blocks 1 to 5. Black: Mean  $\pm$  s.e.m., gray: Individual mice ( $n = 9$ ). Right: Mean ODI inside ("In", 0-100  $\mu$ m) and outside ("Out", 100-200  $\mu$ m) ipsi-clusters (two-sided WMPSR test,  $W = 0$ ,  $p = 0.004$ ,  $n = 9$  mice). **h**, As (**g**), but for trial-blocks 6 to 10 (two-sided WMPSR test,  $W = 0$ ,  $p = 0.004$ ,  $n = 9$  mice). **i**, The standard deviation of the ODI value across individual trial-blocks of each neuron, as a function of distance of that neuron to ipsi-cluster centers (black line shows mean  $\pm$  s.e.m. across mice; two-sided WMPSR test,  $p > 0.05$ ,  $n = 9$  mice).



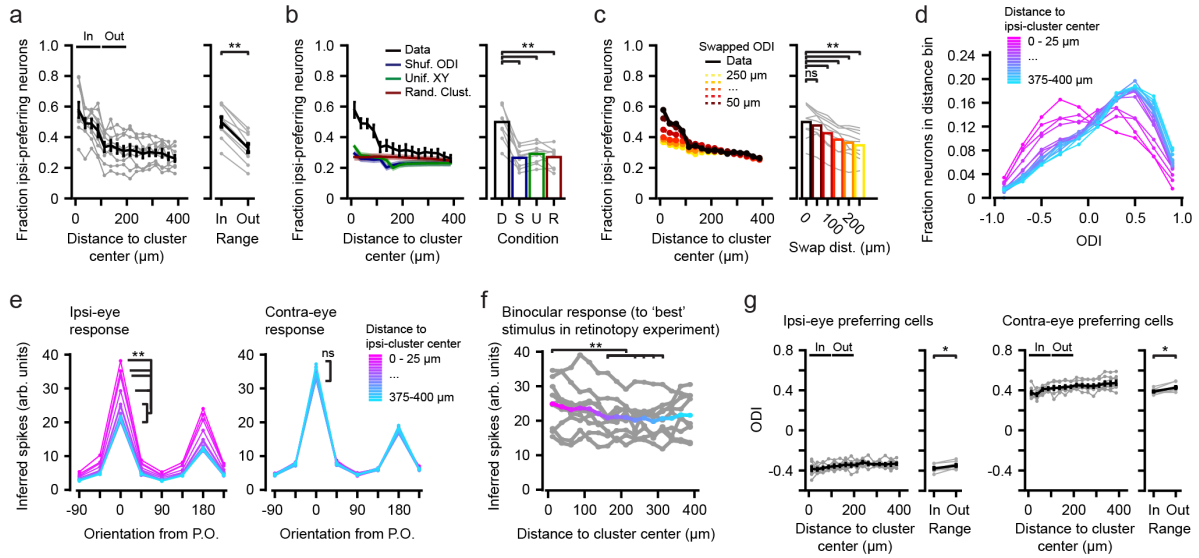

**Supplementary Figure 4 | Fraction of ipsi-prefering neurons, response amplitude and ODI relative to ipsi-clusters.**

**a-c**, Fraction (mean  $\pm$  s.e.m.) of ipsi-prefering neurons as a function of distance to ipsi-clusters. **a**, Comparison of ODI "In" (100  $\mu\text{m}$  range) and "Out" (100-200  $\mu\text{m}$ ) of ipsi-cluster centers (two-sided WMPSR test,  $W = 0$ ,  $p = 0.004$ ,  $n = 9$  mice). **b**, Comparison of original data with global randomization controls, shuffled ODI values (blue), random XY positions (green) and randomly sampled cluster positions (red; two-sided Kruskal-Wallis test,  $H_3 = 16.3$ ,  $p = 0.001$ , post hoc two-sided WMPSR test,  $** p < 0.01$ ,  $n = 9$  mice). **c**, As (**b**), but for local randomization control (swapping ODIs of pairs of neurons; two-sided Kruskal-Wallis test,  $H_5 = 14.2$ ,  $p = 0.015$ , post hoc two-sided WMPSR test, ns not significant,  $* p < 0.05$ ,  $** p < 0.01$ ,  $n = 9$  mice). **d**, Histogram of ODI as a function of distance of cells to ipsi-cluster centers. **e**, Response amplitude to ipsilateral (left) and contralateral eye (right) stimulation, averaged across all neurons, aligned to the preferred direction and as a function of distance to ipsi-clusters (see color legend). Ipsilateral eye stimulation: two-sided Kruskal-Wallis test,  $H_{15} = 98.5$ ,  $p = 2.5 \cdot 10^{-14}$ , post hoc two-sided WMPSR test,  $** p < 0.01$ ; Contralateral eye stimulation: two-sided Kruskal-Wallis test,  $H_{15} = 18.0$ ,  $p = 0.26$ ,  $n = 9$  mice. **f**, Response amplitude (mean  $\pm$  s.e.m.) to binocular stimulation (best stimulus in retinotopic mapping experiment) as function of distance to ipsi-clusters (two-sided Kruskal-Wallis test,  $H_{15} = 45.2$ ,  $p = 7.2 \cdot 10^{-5}$ , post hoc two-sided WMPSR test,  $** p < 0.01$ ;  $n = 9$  mice). **g**, ODI as function of distance to ipsi-cluster centers, separately for ipsilateral and contralateral eye preferring neurons (Ipsi: two-sided WMPSR test,  $W = 4$ ,  $p = 0.027$ ; Contra: two-sided WMPSR test,  $W = 3$ ,  $p = 0.020$ ;  $n = 9$  mice).

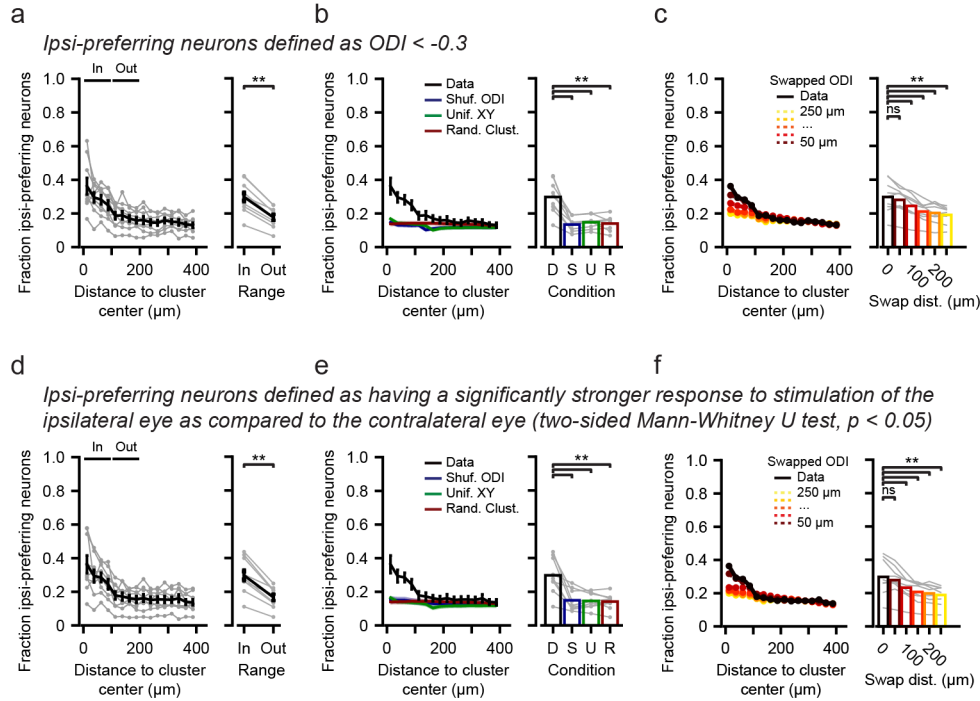

**Supplementary Figure 5 | Fraction of ipsi-prefering neurons relative to ipsi-cluster centers, calculated using different definitions of ‘ipsi-prefering’.**

**a-c**, Fraction of ipsi-prefering neurons (defined as having an ODI smaller than -0.3) as a function of distance to ipsi-clusters; see also Supplementary Fig. 4a-c. **a**, Comparison of ODI “In” (100  $\mu\text{m}$  range) and “Out” (100-200  $\mu\text{m}$ ) of ipsi-cluster centers. **b**, Comparison of original data with global randomization controls, shuffled ODI values (blue), random XY positions (green) and randomly sampled cluster positions (red). **c**, As (**b**), but for local randomization controls (swapping ODIs of pairs of neurons). **d-f**, As (**a-c**), but for ipsi-prefering neurons defined as having a significantly stronger response to the ipsilateral eye as compared to the contralateral eye. All panels: ns not significant, \*\*  $p < 0.01$ ,  $n = 9$  mice.

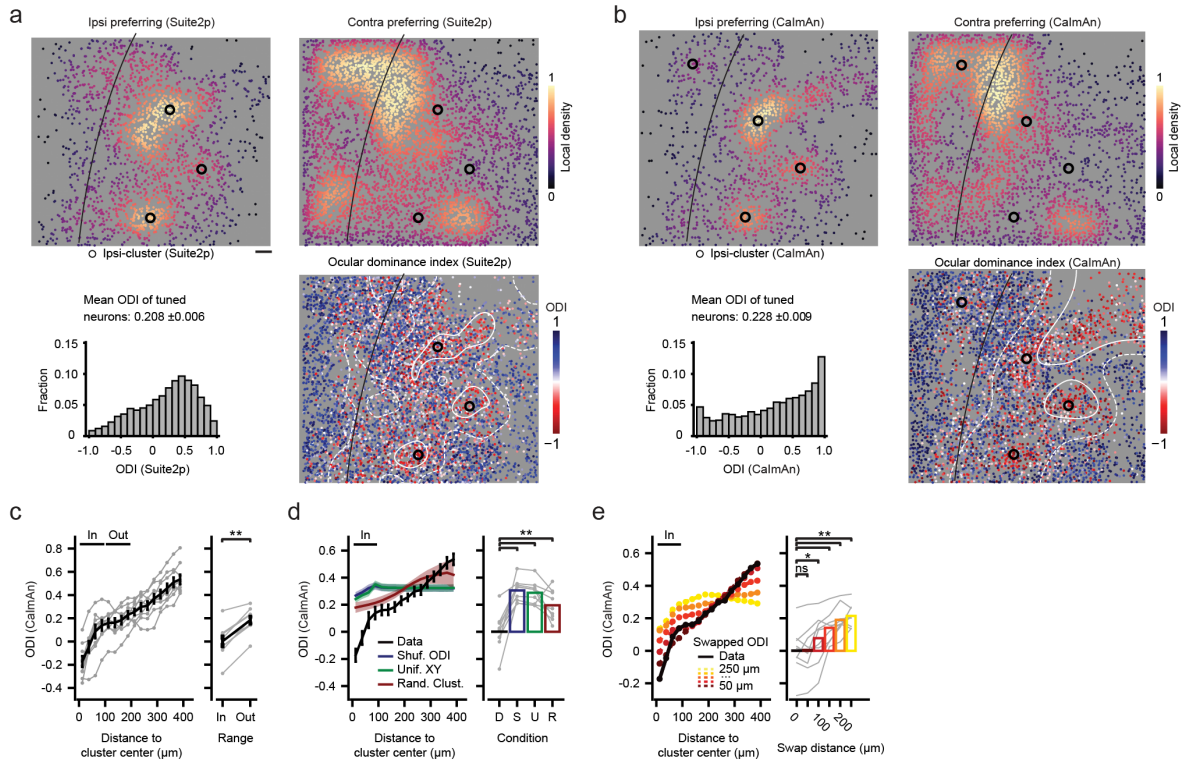

**Supplementary Figure 6 | Comparison across preprocessing methods.**

**a**, Density of ipsilateral and contralateral eye preferring neurons, a histogram of ODI values and a map showing the spatial distribution of ODI values across cortical layer 4 (same data as in Fig. 1c and d; mouse M02; Suite2p-based preprocessing and ROI extraction). Scale bar:  $100 \mu\text{m}$ . **b**, Same as **(a)**, but for CalmAn-based preprocessing and ROI extraction. **c-e**, As Fig. 1g-i, but for CalmAn-based processing (“In” vs. “Out”: Two-sided WMPSR test,  $W = 0$ ,  $p = 0.004$ ; Global randomization controls: Two-sided Kruskal-Wallis test,  $H_3 = 18.4$ ,  $p = 3.6 \cdot 10^{-4}$ , post hoc two-sided WMPSR test,  $** p < 0.01$ ; Local randomization control: Two-sided Kruskal-Wallis test,  $H_5 = 20.5$ ,  $p = 0.001$ , post hoc two-sided WMPSR test, ns not significant,  $* p < 0.05$ ,  $** p < 0.01$ ;  $n = 9$  mice).



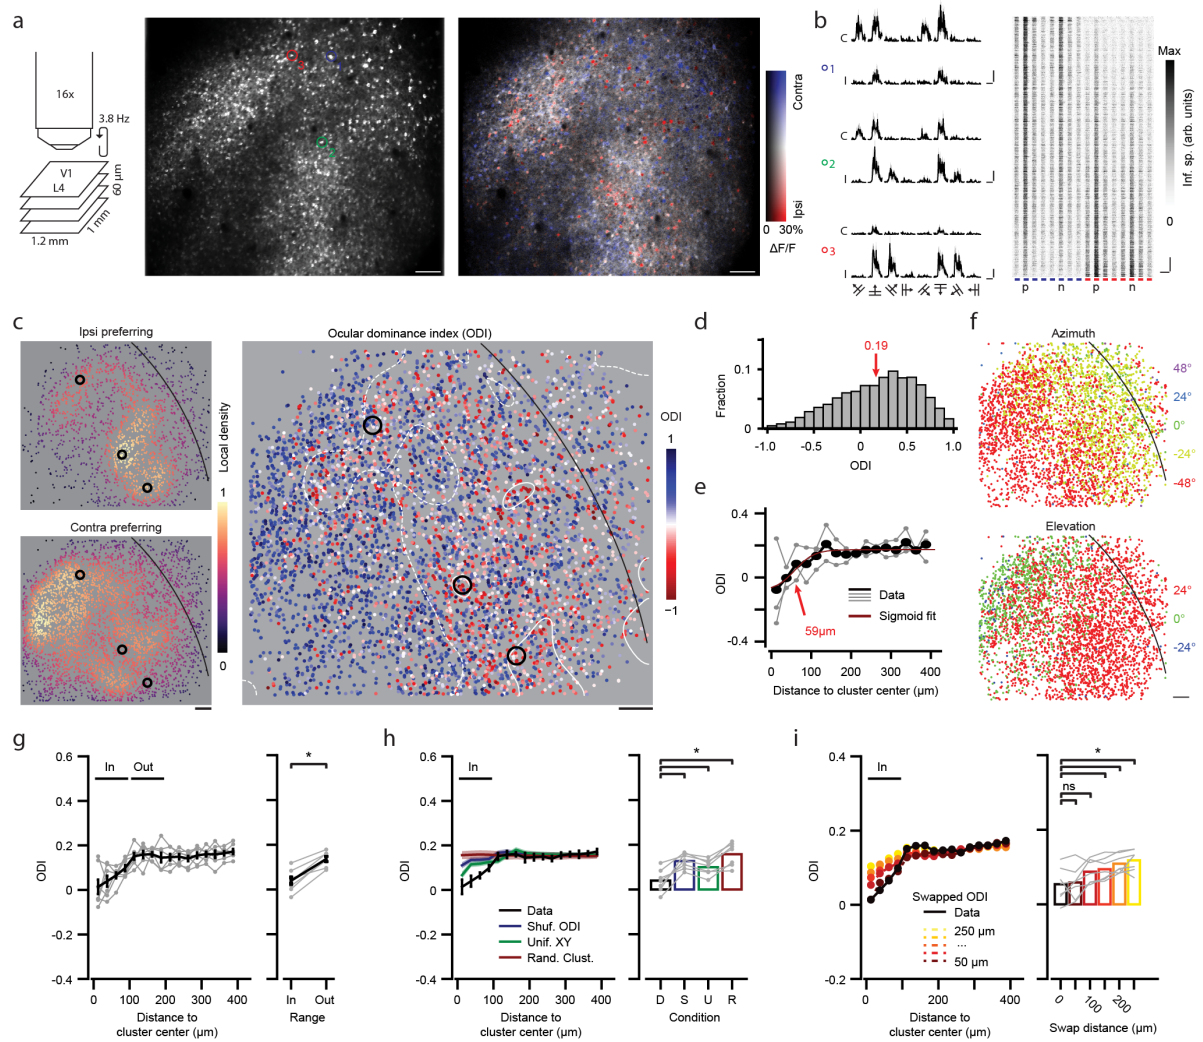

### Supplementary Figure 7 | Layer 4 ipsilateral eye preferring ocular dominance clusters in Scnn1a-Tg3-Cre transgenic mice expressing the calcium indicator jRGECO1a via AAV delivery.

As Fig. 1, based on imaging the red-fluorescent calcium indicator jRGECO1a in Scnn1a-Tg3-Cre mice. Using an AAV, the indicator was conditionally expressed in right-hemisphere L4 neurons. Note that because these data were obtained from the right hemisphere, the maps appear flipped along the horizontal axis compared to e.g. Fig. 1. **a**, Left: Schematic of multilevel acquisition and field of view dimensions. Middle: Projection of an example motion corrected imaging stack (single plane of a four-plane volume) showing neurons expressing jRGECO1a. Right: HLS map showing eye selective responses during visual stimulation (Hue: Preferred eye. Lightness:  $\Delta F/F$  response amplitude. Saturation: Eye selectivity. Scale bar: 100  $\mu$ m). **b**, Left: Trial-averaged peri-stimulus  $\Delta F/F$  responses to eight directions and two eyes, for three example neurons (colored circles in **a**). Right: Trial-averaged inferred spiking responses of all visually responsive neurons ( $n = 1794$ ) in the imaging plane shown in **a**). **c**, Left: Local density of ipsilateral (top) and contralateral (bottom) eye preferring visually responsive neurons across the (four-plane) volume of the example mouse (M10). Black circles indicate detected ipsi-cluster centers. The black line marks the higher area boundary between V1 (left) and lateral higher visual areas (right). Right: ODI of all visually responsive neurons. White lines indicate ODI = 0 (solid) and ODI = 0.2 (dashed). Scale bar: 100  $\mu$ m). **d**, Histogram showing the distribution of ODI values across the example volume. **e**, ODI as function of distance to detected ipsi-cluster centers for the example volume (Gray: individual centers. Black: Mean. Red: Sigmoid fit. Arrow: Point of maximum inclination, approximates the ipsi-cluster radius). **f**, Preferred azimuth (top) and elevation (bottom) of all visually responsive neurons in the example volume. Black line separates V1 (left) from lateral higher areas (right). Scale bar: 100  $\mu$ m). **g**, Left: Mean ( $\pm$ s.e.m.) ODI as function of distance to ipsi-cluster centers (Gray: individual mice). Right: ODI within a 100  $\mu$ m range ("In") of ipsi-cluster centers, compared to outside that range ("Out", 100  $\mu$ m-200  $\mu$ m; two-sided WMPSPR test,  $W = 0$ ,  $p = 0.016$ ,  $n = 7$  mice). **h**, Left: As (**g**), but comparing original data with global randomization controls, shuffling ODI values across neurons (blue), assigning neurons new XY positions randomly sampled from a uniform distribution (green) and assigning new ipsi-cluster centers by random sampling (red). Right: Quantification, showing mean within ipsi-cluster ODI for each condition (two-sided

Kruskal-Wallis test,  $H_3 = 16.6$ ,  $p = 0.009$ , post hoc two-sided WMPSR test, \*  $p < 0.05$ ,  $n = 7$  mice). i, As (g), but for local randomization control, swapping the ODIs of pairs of neurons spaced apart  $50\ \mu\text{m}$  (dark red) to  $250\ \mu\text{m}$  (yellow; two-sided Kruskal-Wallis test,  $H_5 = 14.0$ ,  $p = 0.016$ , post hoc two-sided WMPSR test, ns not significant, \*  $p < 0.05$ ,  $n = 7$  mice).

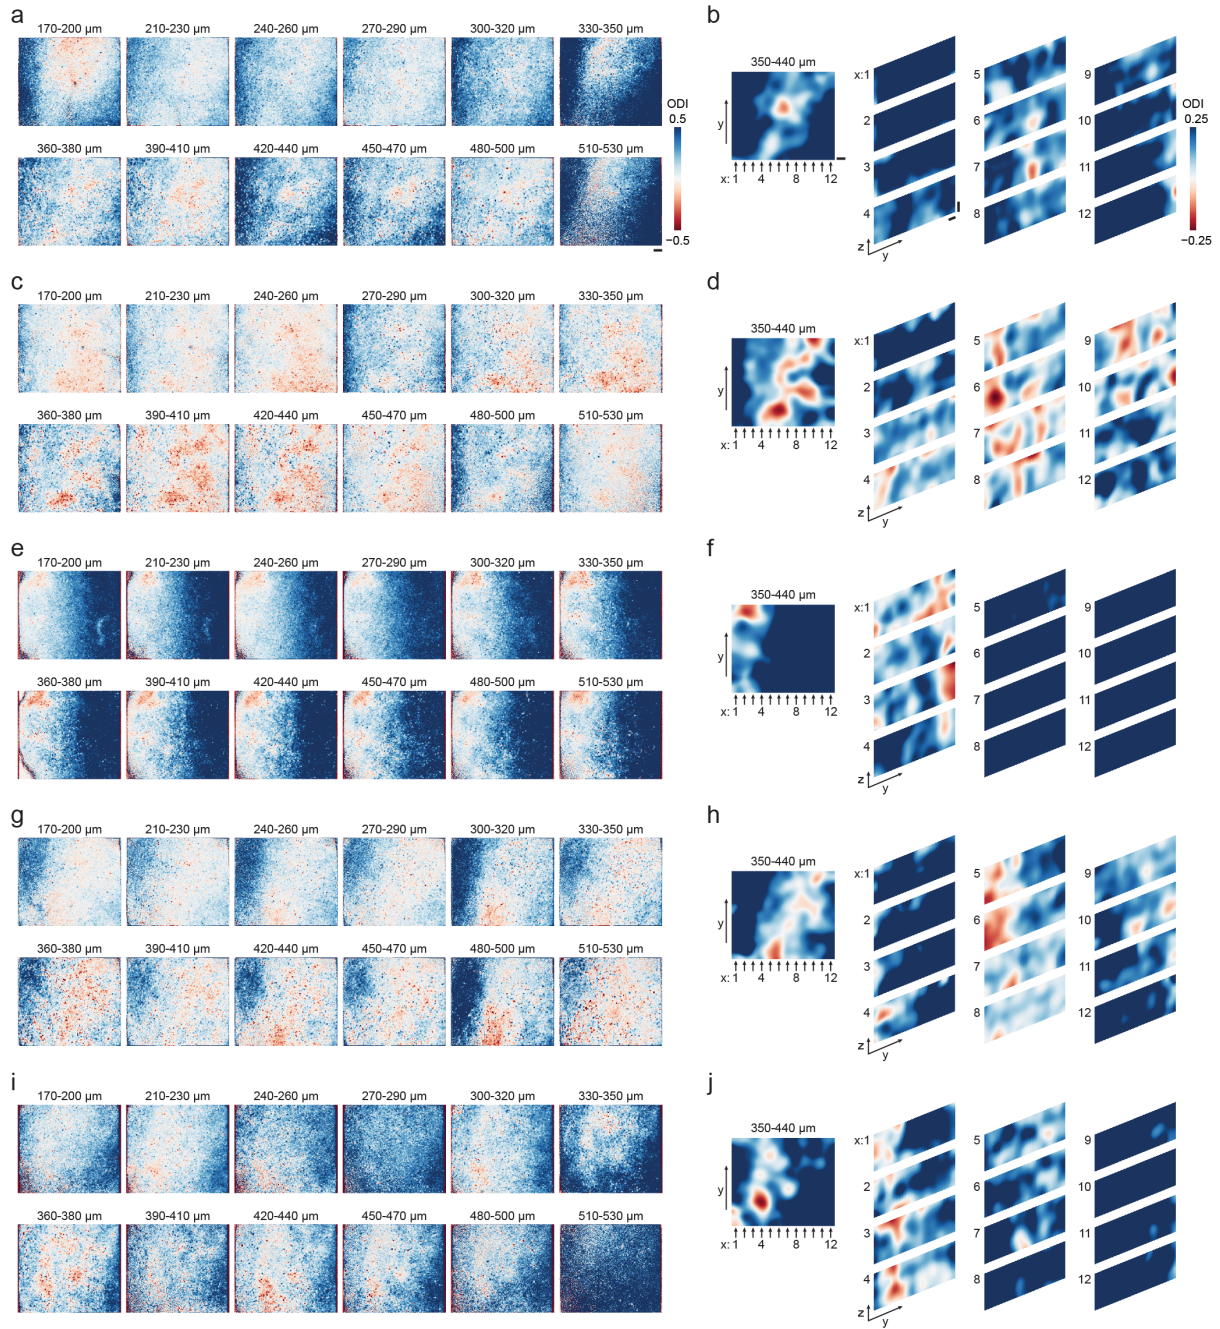

### Supplementary Figure 8 | Examples of ocular dominance patterns spanning cortical layers.

**a**, Pixelwise ODI maps calculated on small sub-volumes of imaging data, acquired in multiple consecutive four-plane volumes across a total depth range of 360  $\mu\text{m}$  (170-530  $\mu\text{m}$  below cortical surface; see Fig. 2a for schematic). Scale bar: 100  $\mu\text{m}$ . **b**, Left: Smoothed pixelwise ODI map of cortical layer 4 (data from 350-440  $\mu\text{m}$  below cortical surface). Arrows indicate the direction along which the three-dimensional imaged volume is re-sliced to generate the side-view, smoothed ODI maps on the right. Right: Vertical slices showing smoothed pixel ODI maps spanning L2/3 to upper L5. Scale bar: 100  $\mu\text{m}$ . **a-j**, Each row represents data from a single example mouse: **a-b**, M01. **c-d**, M02. **e-f**, M03, **g-h**, M05, **i-j**, M06.



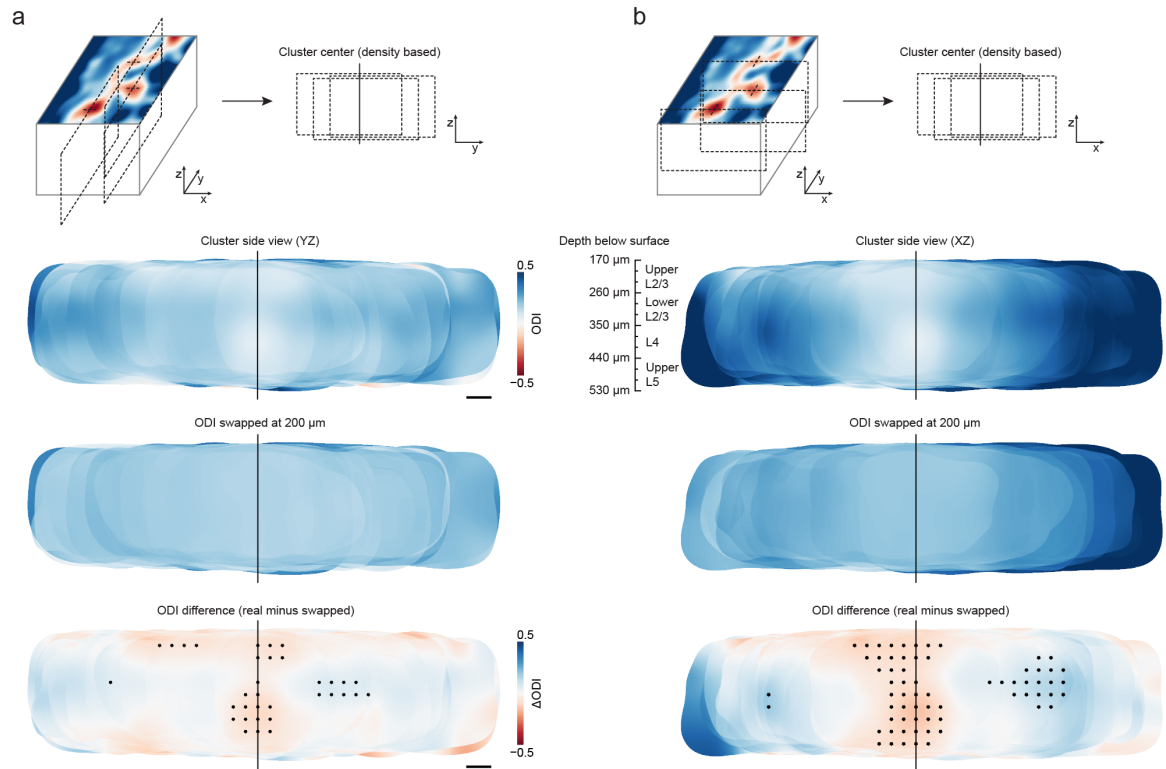

**Supplementary Figure 9 | ODI maps in upper and lower cortical layers relative to layer 4 ipsi-cluster centers.**  
**a**, ODI maps of vertically oriented slices (anterior-posterior), center-aligned at identified ipsi-clusters. Top: Schematic of vertical slice alignment. Middle: The mean (across mice) of all cluster-aligned vertical slices, with real data first and locally shuffled data below (swapped ODIs at 200  $\mu\text{m}$ ). Bottom: Difference between real and shuffled data (two-sided WMPST test, \*  $p < 0.05$ ,  $n = 9$  mice). All side views: The black vertical line indicates the center (origin) of the side-view, to which ipsi-clusters were aligned. Scale bar: 100  $\mu\text{m}$ . **b**, As (**a**), but for slices along the medial-lateral orientation).

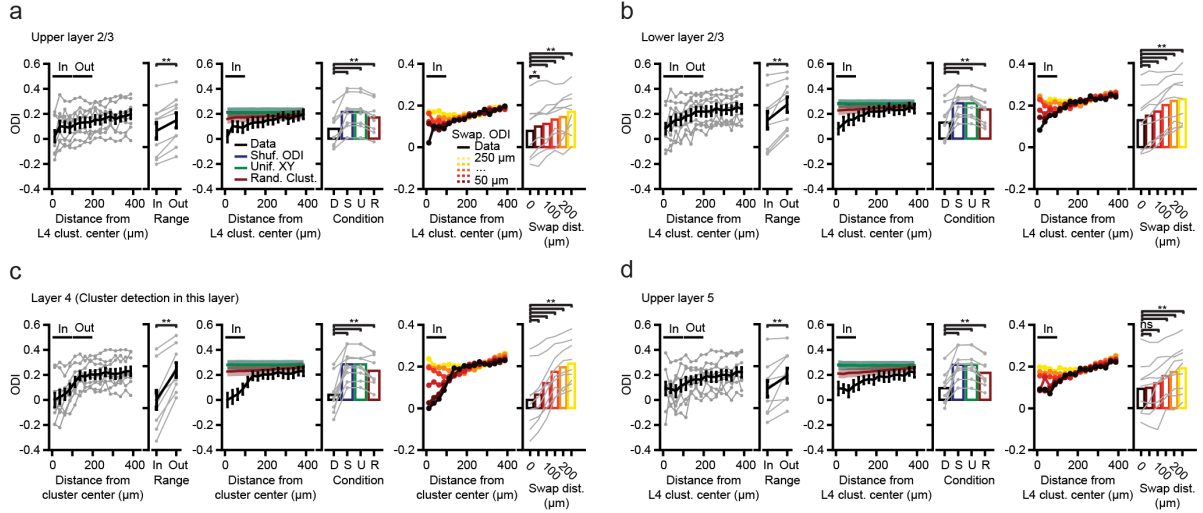

**Supplementary Figure 10 | ODI of neurons in upper and lower cortical layers as a function of distance to ipsi-cluster centers identified in layer 4.**

**a-d**, As Fig. 1g-i, for four sub-volumes spanning the depth range from 170 to 530  $\mu\text{m}$  below cortical surface. Mean ( $\pm$ s.e.m.) ODI of upper L2/3 neurons as function of distance to L4-identified ipsi-cluster centers comparing “In” vs. “Out”, global randomization controls and the local randomization control. Testing, per sub-volume, ODI “In” ipsi-cluster centers against all controls, i.e. “Out”, global and local randomization, normalized per mouse. **a**, Upper layer 2/3: Two-sided Kruskal-Wallis test,  $H_9 = 57.2$ ,  $p = 4.5 \cdot 10^{-8}$ , post hoc two-sided WMP SR test, \*  $p < 0.05$ , \*\*  $p < 0.01$ ,  $n = 9$  mice. **b**, Lower layer 2/3: Two-sided Kruskal-Wallis test,  $H_9 = 47.9$ ,  $p = 2.7 \cdot 10^{-6}$ , post hoc two-sided WMP SR test, \*\*  $p < 0.01$ ,  $n = 9$  mice. **c**, Layer 4: Two-sided Kruskal-Wallis test,  $H_9 = 55.9$ ,  $p = 8.3 \cdot 10^{-8}$ , post hoc two-sided WMP SR test, \*\*  $p < 0.01$ ,  $n = 9$  mice. **d**, Upper layer 5: Two-sided Kruskal-Wallis test,  $H_9 = 56.3$ ,  $p = 7.0 \cdot 10^{-8}$ , post hoc two-sided WMP SR test, ns not significant, \*\*  $p < 0.01$ ,  $n = 9$  mice.

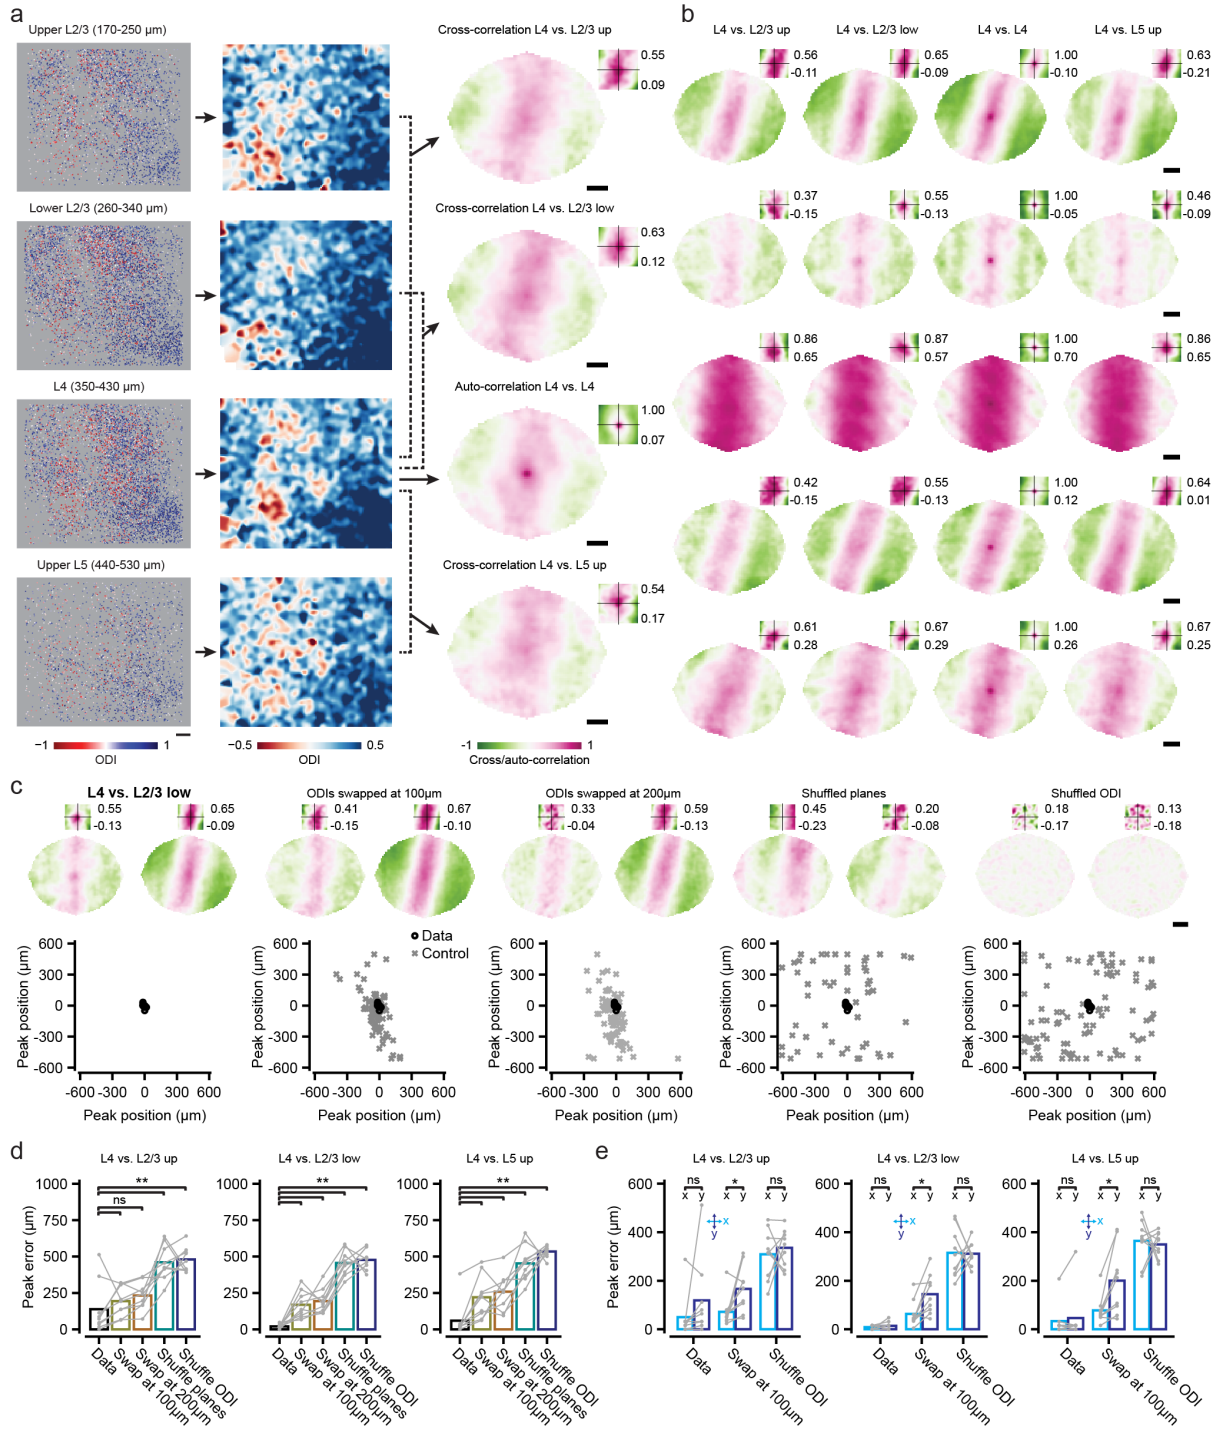

**Supplementary Figure 11 | Cross-correlation analysis of ODI patterns across cortical layers reveals a local and global organization for ocular dominance.**

**a**, Left: For one example mouse (M06), the ODI of all visually responsive neurons in each of four depth-ranges spanning the sampled cortical volume from L2/3 to L5 (see Fig. 2a). Middle: Smoothed ODI maps (see Methods). Right: Auto-/cross-correlation of each ODI map with the L4 ODI map. Right-top: Insets show the cropped map-center of each cross/auto-correlation map, scaled to its respective minimum and maximum correlation value (indicated next to the inset). The scale of the inset is identical to the adjacent cross-correlation map. Scale bar, left: 100  $\mu\text{m}$ . Scale bar, right: 200  $\mu\text{m}$ . **b**, Each row shows the four auto-/cross-correlation maps (as in **a**) of five further example mice (from top to bottom: M01, M02, M03, M05, M04). Scale bar: 200  $\mu\text{m}$ . **c**, Left column, original data. Remaining columns: Local and global randomization controls (ODIs swapped at 100  $\mu\text{m}$ , 200  $\mu\text{m}$ : ODIs of random pairs of cells at approximately a distance of 100  $\mu\text{m}$  or 200  $\mu\text{m}$  were swapped; shuffled planes: Cross-correlation maps calculated between ODI maps of different animals; shuffled ODI: Cross-correlation maps calculated using ODI maps from data with shuffled ODI values; 10 shuffled datasets per mouse). For each column,



top: Cross-correlation maps from two example mice (M02 and M01). Bottom: XY coordinates of all map peaks (original data,  $n = 9$  mice, black; shuffled data,  $n = 9$  mice, 10 shuffles per mouse, gray). Scale bar: 200  $\mu\text{m}$ . **d**, Peak error, defined as the Euclidian distance of the cross-correlation map peak to the center of the map, for original data and local and global randomization controls (see **c**; L2/3 up: Two-sided Kruskal-Wallis test,  $H_4 = 27.8$ ,  $p = 1.4 \cdot 10^{-5}$ ; L2/3 low: Two-sided Kruskal-Wallis test,  $H_4 = 37.8$ ,  $p = 1.2 \cdot 10^{-7}$ ; L5 up: Two-sided Kruskal-Wallis test,  $H_4 = 32.0$ ,  $p = 1.9 \cdot 10^{-6}$ ; post hoc two-sided WMPSR tests, ns not significant,  $** p < 0.01$ ,  $n = 9$  mice). **e**, As (**d**), but for the peak error along the horizontal and vertical dimensions of the cross-correlation maps separately (L2/3 up: Two-sided Kruskal-Wallis test,  $H_4 = 32.1$ ,  $p = 5.7 \cdot 10^{-6}$ ; L2/3 low: Two-sided Kruskal-Wallis test,  $H_4 = 45.5$ ,  $p = 1.1 \cdot 10^{-8}$ ; L5 up: Two-sided Kruskal-Wallis test,  $H_4 = 38.9$ ,  $p = 2.5 \cdot 10^{-7}$ ; post hoc two-sided WMPSR tests, ns not significant,  $* p < 0.05$ ,  $n = 9$  mice). **d,e**, Bars show mean across mice.

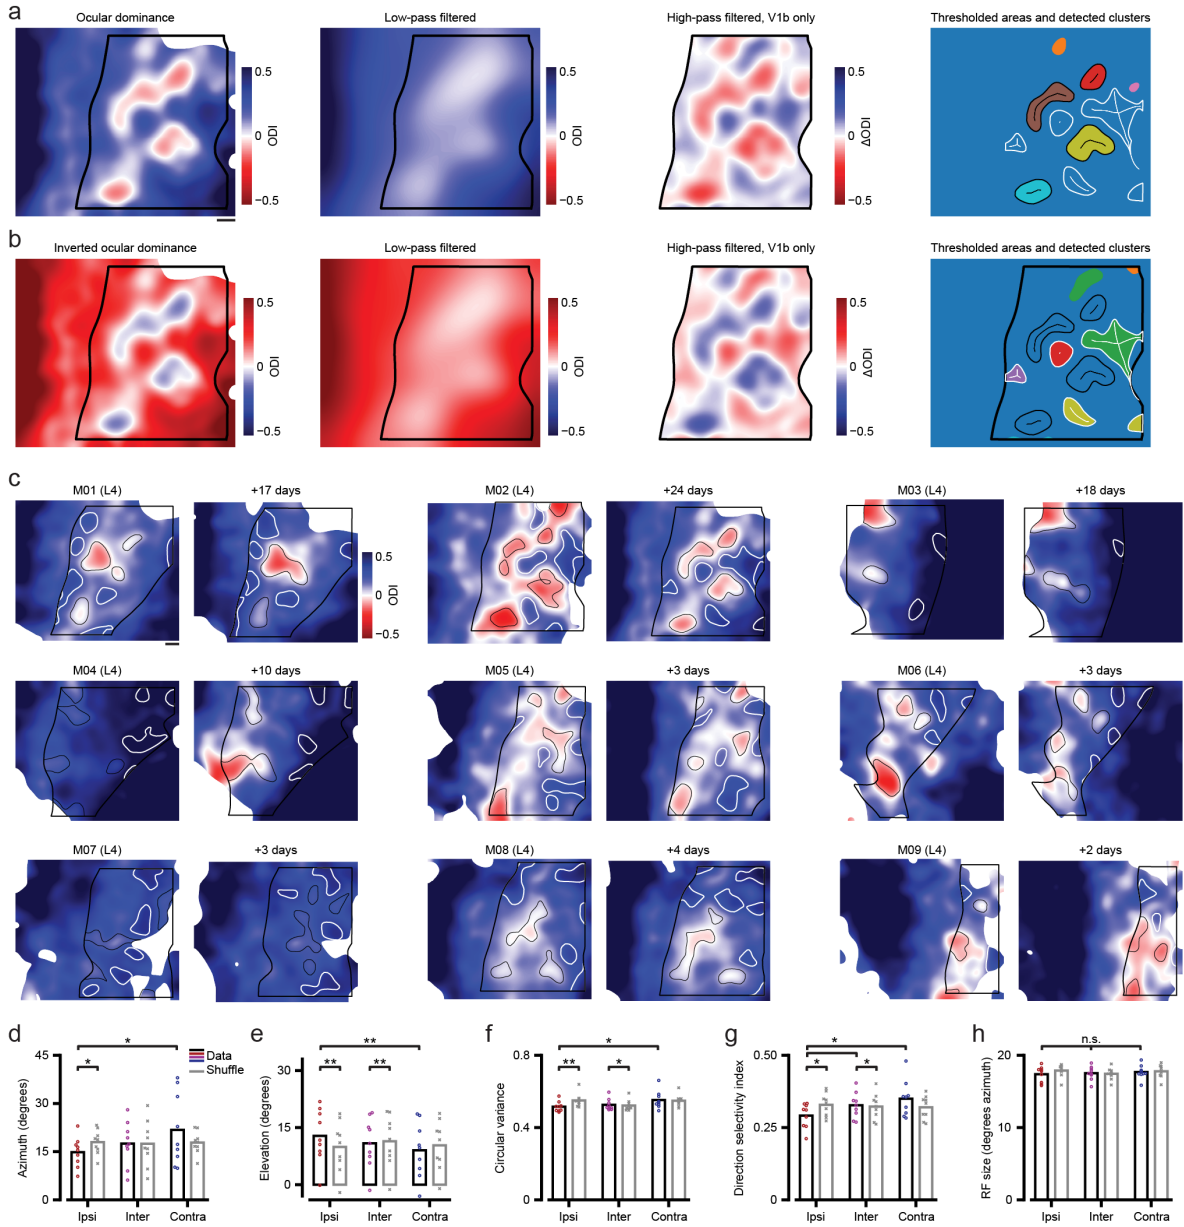

**Supplementary Figure 12 | Identification of geometrically defined clusters from smoothed ODI maps**

**a,b,** Steps for identifying geometrically defined clusters from ODI maps, from left to right: A smoothed ODI map (Gaussian,  $\sigma = 42 \mu\text{m}$ ); a low pass ODI map (Gaussian,  $\sigma = 105 \mu\text{m}$ ); a high pass ODI map (smoothed map minus low pass map), highlighting local increases/decreases in ODI; a thresholded map (high-pass ODI  $< 15^{\text{th}}$  percentile) with boundaries and skeletons for areas within the valid V1b region that have (1) a diameter  $> 100 \mu\text{m}$  and (2) an average ODI  $< 25^{\text{th}}$  percentile of the V1b ODI map. **a,** Ipsilateral eye preferring regions. **b,** Contralateral eye preferring regions. Scale bar:  $100 \mu\text{m}$ . **c,** For each mouse, pairs of ODI maps imaged 2 to 24 days apart, showing V1b (thick black outlined region) and geometry-identified ipsi- (black lines) and contra- (white lines) regions. Scale bar:  $100 \mu\text{m}$ . **d,** Preferred azimuth of neurons in ipsi- (red), contra- (blue) and inter-cluster (pink) regions (Ipsi, inter, contra: Two-sided Kruskal-Wallis test,  $H_2 = 8.9$ ,  $p = 0.012$ , post hoc two-sided WMPSPR test,  $* p < 0.05$ ; Two-sided WMPSPR test; Ipsi vs. shuffle:  $W = 4$ ,  $p = 0.027$ ;  $n = 9$  mice). **e,** As (d), for Elevation (Ipsi, inter, contra: Two-sided Kruskal-Wallis test,  $H_2 = 15.4$ ,  $p = 0.0005$ , post hoc two-sided WMPSPR test,  $** p < 0.01$ ; Two-sided WMPSPR test; Ipsi vs. shuffle:  $W = 1$ ,  $p = 0.008$ ; Inter vs. shuffle:  $W = 0$ ,  $p = 0.004$ ;  $n = 9$  mice). **f,** As (d), for Circular variance (Ipsi, inter, contra: Two-sided Kruskal-Wallis test,  $H_2 = 12.8$ ,  $p = 0.0017$ , post hoc two-sided WMPSPR test,  $* p < 0.05$ ; Two-sided WMPSPR test; Ipsi vs. shuffle:  $W = 1$ ,  $p = 0.008$ ; Inter vs. shuffle:  $W = 2$ ,  $p = 0.012$ ;  $n = 9$  mice). **g,** As (d), for direction selectivity index (Ipsi, inter, contra: Two-sided Kruskal-Wallis test,  $H_2 = 11.8$ ,  $p = 0.0028$ , post hoc two-sided WMPSPR test,  $* p < 0.05$ ; Two-sided WMPSPR test; Ipsi vs. shuffle:  $W = 2$ ,  $p = 0.012$ ; Inter vs. shuffle:  $W = 3$ ,  $p = 0.020$ ;  $n = 9$  mice). **h,** As (d), for receptive field size along the azimuth axis (Ipsi, inter, contra: Two-sided Kruskal-Wallis test,  $p > 0.05$ ;  $n = 9$  mice). **d-h,** Bars show mean across mice.

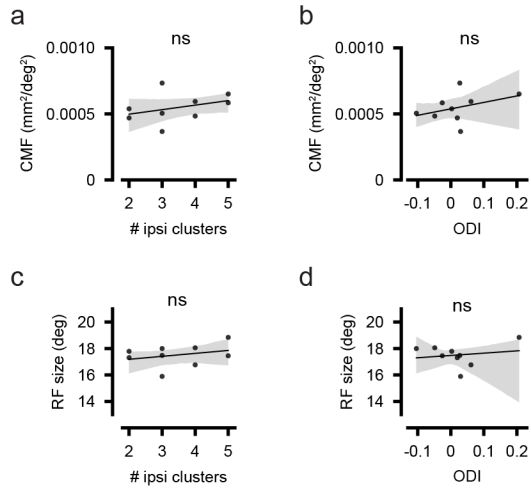

**Supplementary Figure 13 | Correlation of descriptive variables indicating ‘ipsi-cluster quality’, with the cortical magnification factor and neuronal receptive field size.**

**a**, Cortical magnification factor (CMF) in mm<sup>2</sup>/degree<sup>2</sup> (mm<sup>2</sup>/deg<sup>2</sup>) versus the number of ipsi-clusters in each mouse. **b**, As (**a**), but for the mean ODI in ipsi-clusters. **c**, Receptive field (RF) size, in degrees (deg) azimuth, versus the number of ipsi-clusters in each mouse. **d**, As (**c**), but for the ODI in ipsi-clusters. All panels: Individual black dots represent mice ( $n = 9$ ). The regression line shows the best linear fit, with shaded regions indicating the 95% confidence interval (ns not significant: Pearson correlation coefficient,  $p > 0.05$ ).



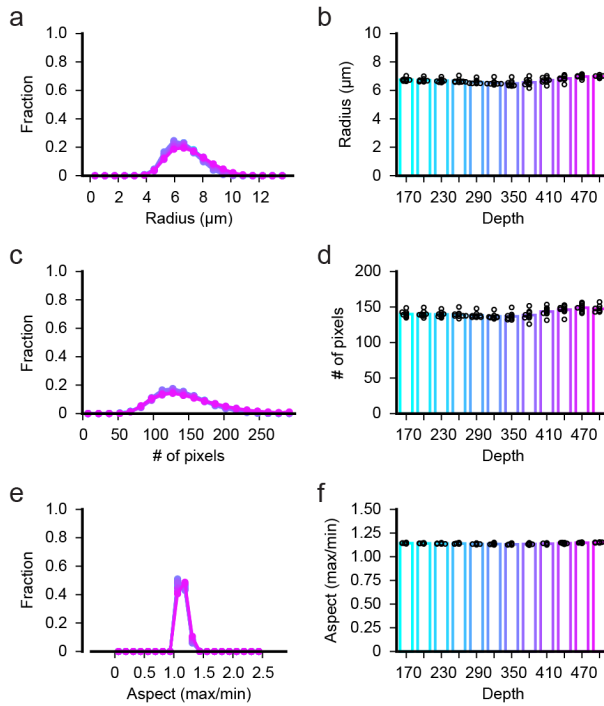

**Supplementary Figure 14 | Shape quantification of ROI footprints across cortical layers.**

**a**, Distributions of ROI footprint radii across cortical depths (for depth-color legend, see bars in **b**). Note that several distribution curves are not visible as they are very similar to the foreground curve. **b**, Mean radius for each depth range. **c,d**, As (**a,b**), but for the area of the ROI footprints (expressed in number of pixels). **e,f**, As (**a,b**), but for the aspect ratio of the ROI footprints.
